# Supplementary material
Source: PubMed Central journal article supplement (PMC5510464)
Supplement: NIHMS870615-supplement-Supp_3.pdf [file NIHMS870615-supplement-Supp_3.pdf]

Thin film spectacle coatings to reduce light sensitivity and headaches in patients with migraine

Principal Investigator: Bradley J Katz, MD, PhD

University of Utah IRB #47263

**Headache Diary**

Study ID:

Inclusive Dates for this Diary:

|                                                                                           | 1-Jan-13 | 2-Jan-13 | 3-Jan-13 | 4-Jan-13 | 5-Jan-13 | 6-Jan-13 | 7-Jan-13 |
|-------------------------------------------------------------------------------------------|----------|----------|----------|----------|----------|----------|----------|
| How many hours did you sleep last night?                                                  |          |          |          |          |          |          |          |
| Headache Today?                                                                           |          |          |          |          |          |          |          |
| Rate the Severity of Your Headache (0-5)                                                  |          |          |          |          |          |          |          |
| Total Hours of Headache?                                                                  |          |          |          |          |          |          |          |
| Light Sensitivity Today? (0-5)                                                            |          |          |          |          |          |          |          |
| Did Headaches Make Activity Difficult?                                                    |          |          |          |          |          |          |          |
| Did Headaches Cause You to Change Activities?                                             |          |          |          |          |          |          |          |
| Did Headaches Cause You to Go to Bed?                                                     |          |          |          |          |          |          |          |
| List name and dosage of any medications you had to take to get rid of your headache today |          |          |          |          |          |          |          |

Thin film spectacle coatings to reduce light sensitivity and headaches in patients with migraine

Principal Investigator: Bradley J Katz, MD, PhD

University of Utah IRB #47263

**Headache Diary**

Study ID:

Inclusive Dates for this Diary:

8-Jan-13 9-Jan-13 10-Jan-13 11-Jan-13 12-Jan-13 13-Jan-13 14-Jan-13

|                                                                  | 8-Jan-13 | 9-Jan-13 | 10-Jan-13 | 11-Jan-13 | 12-Jan-13 | 13-Jan-13 | 14-Jan-13 |
|------------------------------------------------------------------|----------|----------|-----------|-----------|-----------|-----------|-----------|
| How many hours did you sleep last night?                         |          |          |           |           |           |           |           |
| Headache Today?<br>(No=0; Yes=1)                                 |          |          |           |           |           |           |           |
| Rate the Severity of Your Headache<br>(0-5)                      |          |          |           |           |           |           |           |
| Total Hours of Headache?                                         |          |          |           |           |           |           |           |
| Light Sensitivity Today? (0-5)                                   |          |          |           |           |           |           |           |
| Did Headaches Make Activity Difficult?                           |          |          |           |           |           |           |           |
| Did Headaches Cause You to Change Activities?                    |          |          |           |           |           |           |           |
| Did Headaches Cause You to Go to Bed?                            |          |          |           |           |           |           |           |
| List any medications you had to take to get rid of your headache |          |          |           |           |           |           |           |
